# Supplementary material for: The complex structure of bile salt hydrolase from Lactobacillus salivarius reveals the structural basis of substrate specificity
Source: PubMed Central journal article supplement (PMC6711994; doi:10.1038/s41598-019-48850-6), 2019-08-27

# SUPPLEMENTARY INFORMATION

## The complex structure of bile salt hydrolase from *Lactobacillus salivarius* reveals the structural basis of substrate specificity

Fuzhou Xu<sup>1,2</sup>, Xiao-Jian Hu<sup>3\*</sup>, Warispreet Singh<sup>4</sup>, Wenjing Geng<sup>1</sup>, Irina G. Tikhonova<sup>4\*</sup>,  
and Jun Lin<sup>1\*</sup>

<sup>1</sup>Department of Animal Science, The University of Tennessee, Knoxville, TN 37996. USA;

<sup>2</sup>Institute of Animal Science and Veterinary Medicine, Beijing Academy of Agriculture and

Forestry Sciences, Beijing, China; <sup>3</sup> State Key Laboratory of Genetic Engineering, School of

Life Sciences, Collaborative Innovative Centre of Genetics and Development,, Fudan University,

Shanghai 200438, China, <sup>4</sup> Molecular Therapeutics, School of Pharmacy, Medical Biology

Centre, Queen's University Belfast, BT9 7BL, Northern Ireland, United Kingdom

### \*Corresponding author:

Dr. Xiao-Jian Hu, State Key Laboratory of Genetic Engineering, School of Life Sciences, Collaborative Innovative Center of Genetics and Development, Fudan University, Shanghai, China; Email: [xjhu@fudan.edu.cn](mailto:xjhu@fudan.edu.cn)

Dr. Irina G. Tikhonova, Molecular Therapeutics, School of Pharmacy, Medical Biology Centre, Queen's University Belfast, BT9 7BL, Northern Ireland, United Kingdom, Email: [i.tikhonova@qub.ac.uk](mailto:i.tikhonova@qub.ac.uk)

Dr. Jun Lin, Department of Animal Science, The University of Tennessee, 2506 River Drive. Knoxville, TN, USA; Email: [jlin6@utk.edu](mailto:jlin6@utk.edu)

**Figure S1.** The active *ls*BSH-GCA and *ls*BSH-CA complex structure. The wall-eye stereo presentation of the polar interaction around the oxidative cysteine sulfonic acid OCS-2 in chain F (A), substrate GCA in chain F (B) and product CA in chain G (C). The refined density map around OCS-2, GCA, CA and ligand-bound water molecules were shown. The 2FoFc map contoured at 1.0  $\sigma$  (blue) and FoFc map contoured at  $\pm 3.0 \sigma$  (green and red) were shown. For clarity residues 128-139 are hid in (B) and (C). The polar contacts were plotted as red dot line and the length below 3.20 Å were shown.

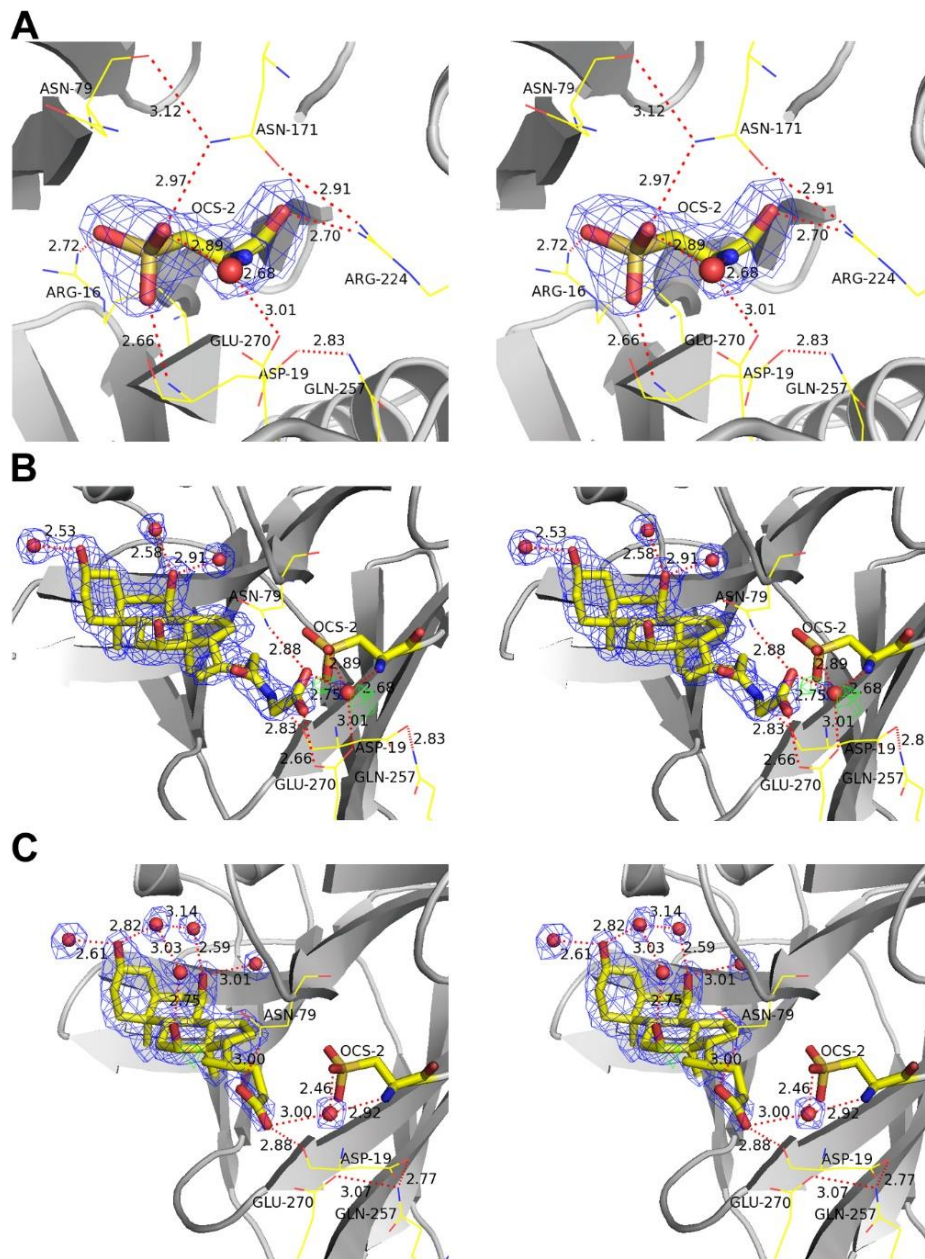

**Figure S2.** Sequence Alignment of BSH isotypes. The first four sequences of BSH with available crystal structures are shown with the PDB code. GenBank access code are given for all BSH sequences. Substrate preference: to glycol-conjugated bile acids, GC or tauro-conjugated bile acids, TC is shown from Dong *et al*, *Protein Science*, 2018, Vol. 27, pages 1742-1754. Loops 1-4 lining the active sites are highlighted in yellow. Residues involved in the catalytic reaction and substrate binding are in cyan and pink. Residues in pink contribute to substrate specificity. The red asterisk indicates the residues mutated in this study.

|                                  |   |   |  |    |    |    |  |    |  | Substrate | GenBank code |            |
|----------------------------------|---|---|--|----|----|----|--|----|--|-----------|--------------|------------|
| 5Y7P_L_salivarius                | * |   |  | 20 |    | 40 |  | 60 |  | 67        | GC           | AFP87505.1 |
| 2BJF_C_Perfringens               |   | * |  |    |    |    |  |    |  | 70        | TC           | AAC43454.1 |
| 4WL3_E_Feacalis                  |   |   |  |    | *  |    |  |    |  | 66        | TC           | EET97240.1 |
| 2HEZ_B_Longum                    |   |   |  |    |    |    |  |    |  | 69        | GC           | AAF67801.1 |
| BSHA_L_acidophilus_NCFM          |   |   |  |    |    |    |  |    |  | 67        | GC           | AAV42751.1 |
| BSHB_L_acidophilus_NCFM          |   |   |  |    |    |    |  |    |  | 67        | TC/GC        | AAV42923.1 |
| L_fermentum_NCDO394              |   |   |  |    |    |    |  |    |  | 69        | GC           | AEZ06356.1 |
| BSH $\alpha$ _L_johnsonii100_100 |   |   |  |    |    |    |  |    |  | 68        | TC/GC        | AAG22541.1 |
| BSHA_L_johnsoni_PF01             |   |   |  |    |    |    |  |    |  | 68        | TC           | EGP12224.1 |
| BSHB_L_johnsoni_PF01             |   |   |  |    |    |    |  |    |  | 69        | TC           | EF536029.1 |
| BSHC_L_johnsoni_PF01             |   |   |  |    |    |    |  |    |  | 67        | GC           | EGP12391.1 |
| L_plantarum_80                   |   |   |  |    |    |    |  |    |  | 67        | GC           | AAB24746.1 |
| L_plantaru_WCFS1                 |   |   |  |    |    |    |  |    |  | 67        | GC           | CAD65617.1 |
| L_plantarum_80                   |   |   |  |    |    |    |  |    |  | 67        | TC           | ACL98197.1 |
| L_plantarum_80                   |   |   |  |    |    |    |  |    |  | 67        | TC/GC        | ACL98205.1 |
| L_salivarius_JCM1046             |   |   |  |    |    |    |  |    |  | 67        | TC           | ACL98194.1 |
| L_salivarius_UCC118              |   |   |  |    |    |    |  |    |  | 67        | GC           | ACL98201.1 |
| L_salivarius_B-30514             |   |   |  |    |    |    |  |    |  | 67        | GC           | AFP87505.1 |
| BSH $\beta$ _L_johnsonii100_100  |   |   |  |    |    |    |  |    |  | 69        | TC/GC        | AAC34381.1 |
| B_animalis_subsp.lactis_Bi30     |   |   |  |    |    |    |  |    |  | 68        | GC           | AEK27050.1 |
| B_animalis_subsp.Lactis_KL612    |   |   |  |    |    |    |  |    |  | 68        | GC           | AAS98803.1 |
| B_bifidum_ATTCC_11863            |   |   |  |    |    |    |  |    |  | 70        | GC           | AAR39435.1 |
|                                  | 2 |   |  | 16 | 19 | 24 |  |    |  | 58        | 65           |            |

loop\_3

80 \* 100 \* 120 \* 140

5Y7P\_L\_salivarius : INEDGLGMAGLNFPGNAYYSDALENDKDNITPFEFIPWILGQCSDVNEARNLVEKINLINLSFS-EQLPL : 136  
 2BJF\_C\_Perfringens : MNEKGLGCAGLNFVYVYSKEDIKGTNIPVYNFLWVLANFSSVEEVKEATKNANIVDIPIS-ENIPN : 139  
 4WL3\_E\_Feacalis : INEKGLGMAGLNFSGYADYKKI-EEGKENVSPFEFIPWVLCQSTVDEAKKLLKNLNLVNINFS-DELPL : 134  
 2HEZ\_B\_Longum : ANEHGLAIAGLNFPGYASFFVHEPVEGTENVATFEFPLWVARNFDSVDEVEETLRNVTLVSVQIVP--GQQE : 137  
 BSHA\_L\_acidophilus\_NCFM : INEKGLGIAGLNFQGNHYFVK-IEGKKNIASFEFLMPYLLSNCENTDDVKEITLDNANILNISFS-ANYP : 135  
 BSHB\_L\_acidophilus\_NCFM : TNEKGLGMAGLNFPGNATYEE-KENKDNIASFEFIPWILGQCSTISEVKDLSRINIADLNFS-EKMQA : 135  
 L\_fermentum\_NCD0394 : VNEFGLMAQKLTFKNGARLVDRHPDKVQLAAEFELIFYLLGHFKSVADVAHLDQIELMNDVNADVPFGY : 139  
 BSHα\_L\_johnsonii100\_100 : SNEEGLGIAGLNFDPGCHYFPE-NAEKNNVTPFELIPYLLSQCTTVAEVKDALKDVSLVNINFS-EKLPL : 136  
 BSHA\_L\_johnsoni\_Pf01 : SNEEGLGIAGLNFDPGCHYFPE-VSGKNNVTPFELIPYLLSQYTTVAEVKEATKSVNLVKINFS-EKLQL : 136  
 BSHB\_L\_johnsoni\_Pf01 : YNEEGLGIAGLNFPHFAKFDGPIIDKINLASYEIMLVWVQNFTHVSEVKEATKNVNLVNEAIN-TSFAV : 138  
 BSHC\_L\_johnsoni\_Pf01 : INEKGLGIAGLNFDPGKYFAV-DESKNNVTSFELIPYLLSQSCETIEDVKKLLSETNITDESFS-KDLPV : 135  
 L\_plantarum\_80 : MNEKGLCIAGLNFAGYADYKDY-DADKVNITPFEFIPWLLGQFSSVREVKKNIQKLNLVNINFS-EQLPL : 135  
 L\_plantaru\_WCFs1 : MNEKGLCIAGLNFAGYADYKDY-DADKVNITPFEFIPWLLGQFSSVREVKKNIQKLNLVNINFS-EQLPL : 135  
 L\_plantarum\_80 : INEDGLGMAGLNFPGNAYYSDALENDKDNITPFEFIPWILGQCSDVNEARNLVERINLINLSFS-EQLPL : 136  
 L\_plantarum\_80 : ANEEGLGMAGLNFDPGPAHFPPV-EEGKDNVSPFEFIPYILGQCKNVAEAKELKSNLNVNINFS-DQLQL : 135  
 L\_salivarius\_JCM1046 : INEDGLGMAGLNFPGNAYYSDALENDKDNITPFEFIPWILRQCSDVNEARNLVERINLINLSFS-EQLPL : 136  
 L\_salivarius\_UCC118 : INEDGLGMAGLNFPGNAYYSDALENDKDNITPFEFIPWILGQCSDVNEARNLVEKINLINLSFS-EQLPL : 136  
 L\_salivarius\_B-30514 : MNEKGLCIAGLNFAGYADYKDY-DADKVNITPFEFIPWLLGQFSSVREVKKNIQKLNLVNINFS-EQLPL : 135  
 BSHβ\_L\_johnsonii100\_100 : YNEEGLGIAGLNFPHFAKFDGPIIDKINLASYEIMLVWVQNFTHVSEVKEATKNVNLVNEAIN-TSFAV : 138  
 B\_animalis\_subsp.lactis\_Bi30 : MNDAGLAVAGLNFAGYCKYATEAVNFTTNVAAYEFPLWVTRNFTSVDDVQEAATKNVTIVGKPIN-DRFPV : 137  
 B\_animalis\_subsp.Lactis\_KL612 : MNDAGLAVAGLNFAGYCKYATEAVNFTTNVAAYEFPLWVTRNFTSVDDVQEAATKNVTIVGKPIN-DRFPV : 137  
 B\_bifidum\_ATTCC\_11863 : ANEHGLAIAGLNFPGYASFAHEPVEGTENVATFEFPLWVARNFDSVDEVEEATKNVTLVSVQVVP--GQQE : 138

79

134

\* 160 \*\*\*\*\*180 \* 200 \*

5Y7P\_L\_salivarius : AGLHHLIADRE-KSIVVEVT-KSGVHIYDNPVGLTNNPEFNYQMYNLNKYRNLSISTPQNTFSDSVDLK : 204  
 2BJF\_C\_Perfringens : TTHHWMISDITGKSIIVVEQT-KEKLNVDNNGVLTNSPTFDWHVANLNQYVGRYQVPEFKLGDQSLT : 208  
 4WL3\_E\_Feacalis : SPLHHLIADRE-KSIVVEST-KEGLRVFDNPGVLTNNPTFDYQLFNLNRYRNLSTRTPKNNFSDQIELD : 202  
 2HEZ\_B\_Longum : SLHHLWFIGDGK-RSIVVEQM-ADGMHVHDDVDVLTNQPTFDHFMENLRNYMCSVNEMAEPITWGWKASLT : 205  
 BSHA\_L\_acidophilus\_NCFM : ADLHHLIADRE-KSIVVEST-NSGLHVIYDNPVGLTNNPEFDQLIKLSDYADVTPHNPKNLTPVNDLN : 204  
 BSHB\_L\_acidophilus\_NCFM : SSLHHLIADKTGTSLVVETD-KDGMHIYDNPVGLTNNPQFPKQLFNLNRYRNLSPKMPKNNFSDKVNMA : 204  
 L\_fermentum\_NCD0394 : SEQHVLSDPTGRGVVIEPS-EHPLKLDNPLGEMTNNPKFDHQLERLQDYLDFTPDFLNGTLAPNTFHV : 208  
 BSHα\_L\_johnsonii100\_100 : SPLHHLIADKTGSIIVVEST-LSGLHVIYDNPVGLTNNPEFPGQLRNLNRYRNLAPAQPKNTLVPVNDLN : 205  
 BSHA\_L\_johnsoni\_Pf01 : SPLHHLIADKTGSIIVVEST-LSGLHVIYDNPVGLTNNPEFPGQLRNLNRYRNLAPAQPKNTLVPVNDLN : 205  
 BSHB\_L\_johnsoni\_Pf01 : APHHLIADSD-EAIIIVEVSKQYGMKVFDKVGVLTSNPFNWHLTNLGNVYTGPHDATAQSWNGQKVA : 207  
 BSHC\_L\_johnsoni\_Pf01 : TTHHWMISDITGKSIIVVEST-ETGLHVIYDNPVGLTNNPVPFAQVETLANFASVSPAQPKNTLVPNADLN : 204  
 L\_plantarum\_80 : SPLHHLIADKQ-ESIVIESV-KEGLKIYDNPVGLTNNPFDYQLFNLNRYRNLSTPQNSFSEKVDLD : 203  
 L\_plantaru\_WCFs1 : SPLHHLIADKQ-ESIVIESV-KEGLKIYDNPVGLTNNPFDYQLFNLNRYRNLSTPQNSFSEKVDLD : 203  
 L\_plantarum\_80 : AGLHHLIADRE-KSIVVEVT-KSGVHIYDNPVGLTNNPEFNYQMYNLNKYRNLSISTPQNTFSDSVDLK : 204  
 L\_plantarum\_80 : SPLHHLIADKSGAATVVEST-ASGLHVIYDNPVGLTNNPEFDQLTNLNRYRNLSPANPANTLAPQATALA : 204  
 L\_salivarius\_JCM1046 : AGLHHLIADRE-KSIVVEVT-KSGVHIYDNPVGLTNNPEFNYQMYNLNKYRNLSISTPQNTFSDSVDLK : 204  
 L\_salivarius\_UCC118 : AGLHHLIADRE-KSIVVEVT-KSGVHIYDNPVGLTNNPEFNYQMYNLNKYRNLSINTPQNTFSDSVDLK : 196  
 L\_salivarius\_B-30514 : SPLHHLIADKQ-ESIVIESV-KEGLKIYDNPVGLTNNPFDYQLFNLNRYRNLSTPQNSFSEKVDLD : 203  
 BSHβ\_L\_johnsonii100\_100 : APHHLIADSD-EAIIIVEVSKQYGMKVFDKVGVLTSNPFNWHLTNLGNVYTGPHDATAQSWNGQKVA : 207  
 B\_animalis\_subsp.lactis\_Bi30 : ATLHHLIADNT-RSIVVECT-EDGMHVYDDVDVLTNQPPFPQIEHLNRYRNLSPRTGKSVKWSSELE : 205  
 B\_animalis\_subsp.Lactis\_KL612 : ATLHHLIADNT-RSIVVECT-EDGMHVYDDVDVLTNQPPFPQIEHLNRYRNLSPRTGKSVKWSSELE : 205  
 B\_bifidum\_ATTCC\_11863 : SLHHLWFIGDGT-RSIVVEQM-ADGMHVHDDVDVLTNQPTFDHFMENLRNYMCSVNEMAEPITWGWKAELS : 206

171

loop\_4

|                               |     |                            |       |       |                 |            |        |        |          |          |          |         |       |     |         |       |       |    |          |       |   |   |   |   |   |   |   |   |   |   |   |   |   |       |       |       |
|-------------------------------|-----|----------------------------|-------|-------|-----------------|------------|--------|--------|----------|----------|----------|---------|-------|-----|---------|-------|-------|----|----------|-------|---|---|---|---|---|---|---|---|---|---|---|---|---|-------|-------|-------|
|                               | 220 | *                          | 240   | *     | 260             | *          | *      | *      | 280      |          |          |         |       |     |         |       |       |    |          |       |   |   |   |   |   |   |   |   |   |   |   |   |   |       |       |       |
| 5Y7P_L_salivarius             | :   | VDGTGFGGIGLPGDVSPESRFVRAAF | SKLNS | SKG   | MTVEEDITQ       | FFHILG     | TV     | EQIKGV | NKTESGKE | EYTVY    | : 274    |         |       |     |         |       |       |    |          |       |   |   |   |   |   |   |   |   |   |   |   |   |   |       |       |       |
| 2BJF_C_Perfringens            | :   | ALGQGTGLVGLPGDFTPASRFIRVAF | FLR   | DA    | MIKNDKDSIDLIEFF | FHILNN     | VAMVRG | STR    | TVEEKS   | DLTQY    | : 278    |         |       |     |         |       |       |    |          |       |   |   |   |   |   |   |   |   |   |   |   |   |   |       |       |       |
| 4WL3_E_Feacalis               | :   | IYSRGMGGIGLPGDLSSVSRFVKATF | TKLNS | VSR   | SSSEYESISQFF    | FHILSS     | VE     | QKGL   | CDVGDKEY | EYTIY    | : 272    |         |       |     |         |       |       |    |          |       |   |   |   |   |   |   |   |   |   |   |   |   |   |       |       |       |
| 2HEZ_B_Longum                 | :   | AWGACVSMHGIPGDVSSPSRFVRAAF | YTN   | NAHY  | PQQNDEAANVSRLE  | FHTLGS     | VQ     | MV     | DM       | AKMGDQGF | ERTLF    | : 275   |       |     |         |       |       |    |          |       |   |   |   |   |   |   |   |   |   |   |   |   |   |       |       |       |
| BSHA_L_acidophilus_NCFM       | :   | LYSRGLGTHHLPDGMDS          | SRFV  | RAAF  | VFLAHTPQ        | GKNEVEN    | VNTNY  | FHIL   | HSVE     | QPKGL    | DEVEDNRY | EYTM    | : 274 |     |         |       |       |    |          |       |   |   |   |   |   |   |   |   |   |   |   |   |   |       |       |       |
| BSHB_L_acidophilus_NCFM       | :   | GYSRGLGSHNLPDGMDS          | SRFV  | RAAF  | FNKFN           | APIAETEEEN | IDTY   | FHIL   | HSVE     | QKGL     | DEVGPN   | SFEYTIY | : 274 |     |         |       |       |    |          |       |   |   |   |   |   |   |   |   |   |   |   |   |   |       |       |       |
| L_fermentum_NCDO394           | :   | TTGKLSGKKTTPGAYTPKGFYVRAAF | YMKEL | ADQ   | PASKDEALAT      | TWHLL      | DS     | V      | TP       | KSKA     | ----     | HRPT    | F     | SVY | : 274   |       |       |    |          |       |   |   |   |   |   |   |   |   |   |   |   |   |   |       |       |       |
| BSHα_L_johnsonii100_100       | :   | LYSRGLGTHHLPDGMDS          | SRFV  | RAAF  | VVRAHS          | PQGN       | NELSS  | VNTNY  | FHIL     | HSVE     | QPKGT    | DE      | V     | GPN | SYEYTIY | : 275 |       |    |          |       |   |   |   |   |   |   |   |   |   |   |   |   |   |       |       |       |
| BSHA_L_johnsoni_PF01          | :   | LYSRGLGTHHLPDGMDS          | SRFV  | RAAF  | VVRAHS          | PQGN       | NELSS  | VNTNY  | FHIL     | HSVE     | QPKGT    | DE      | V     | GPN | SYEYTIY | : 275 |       |    |          |       |   |   |   |   |   |   |   |   |   |   |   |   |   |       |       |       |
| BSHB_L_johnsoni_PF01          | :   | PWGVGTGSLGLPGDSIPADRFVKAAY | LVN   | VNY   | PTAKGEKAN       | VAKF       | FNIL   | KS     | VAM      | IKG      | SV       | VND     | Q     | GK  | DEYTVY  | : 277 |       |    |          |       |   |   |   |   |   |   |   |   |   |   |   |   |   |       |       |       |
| BSHC_L_johnsoni_PF01          | :   | LYSRGLGTHHLPDGMDS          | SRFV  | RAAF  | YVLAHS          | PKGN       | DEV    | NVNTNY | FHIL     | HSVE     | QAKGT    | DE      | V     | DN  | VFEFTMY | : 274 |       |    |          |       |   |   |   |   |   |   |   |   |   |   |   |   |   |       |       |       |
| L_plantarum_80                | :   | SYSRGMGGLGLPGDLSSMSRFVRAAF | TKLNS | LPM   | QTESGS          | VSQFF      | FHIL   | GS     | VE       | QKGL     | CE       | V       | T     | D   | GKY     | EYTIY | : 273 |    |          |       |   |   |   |   |   |   |   |   |   |   |   |   |   |       |       |       |
| L_plantaru_WCFs1              | :   | SYSRGMGGLGLPGDLSSMSRFVRAAF | TKLNS | LPM   | QTESGS          | VSQFF      | FHIL   | GS     | VE       | QKGL     | CE       | V       | T     | D   | GKY     | EYTIY | : 273 |    |          |       |   |   |   |   |   |   |   |   |   |   |   |   |   |       |       |       |
| L_plantarum_80                | :   | VDGTGFGGIGLPGDVSPESRFVRAAF | SKLNS | SKG   | TTVEEDITQ       | FFHILG     | TV     | EQIKGV | NKTESGKE | EYTVY    |          |         |       |     |         |       | : 274 |    |          |       |   |   |   |   |   |   |   |   |   |   |   |   |   |       |       |       |
| L_plantarum_80                | :   | SYSRAGSHFLPGDMDS           | SRFV  | KEVET | TLQH            | APAG       | ETE    | VAN    | VNTNY    | FH       | CL       | H       | A     | E   | QKGL    | DE    | V     | GK | DQFEYTIY | : 274 |   |   |   |   |   |   |   |   |   |   |   |   |   |       |       |       |
| L_salivarius_JCM1046          | :   | VDGTGFGGIGLPGDVSPESRFVRAAF | SKLNS | SKG   | TTVEEDITQ       | FFHILG     | TV     | EQIKGV | NKTESGKE | EYTVY    |          |         |       |     |         |       |       |    |          | : 274 |   |   |   |   |   |   |   |   |   |   |   |   |   |       |       |       |
| L_salivarius_UCC118           | :   | VDGTGFGGIGLPGDVSPESRFVRAAF | SKLNS | SKG   | TTVEEDITQ       | FFHILG     | TV     | EQIKGV | NKTESGKE | EYTVY    |          |         |       |     |         |       |       |    |          | : 266 |   |   |   |   |   |   |   |   |   |   |   |   |   |       |       |       |
| L_salivarius_B-30514          | :   | SYSRGMGGLGLPGDLSSMSRFVRAAF | TKLNS | LSM   | QTESGS          | VSQFF      | FHIL   | GS     | VE       | QKGL     | CE       | V       | T     | D   | GKY     | EYTIY | : 273 |    |          |       |   |   |   |   |   |   |   |   |   |   |   |   |   |       |       |       |
| BSHβ_L_johnsonii100_100       | :   | PWGVGTGSLGLPGDSIPADRFVKAAY | LVN   | ANY   | PTVKGEKAN       | VAKF       | FNIL   | KS     | VAM      | IKG      | SV       | VND     | Q     | G   | QSD     | EYTVY | : 277 |    |          |       |   |   |   |   |   |   |   |   |   |   |   |   |   |       |       |       |
| B_animalis_subsp.lactis_Bi30  | :   | TNQDSNSSQGLPGGYGSMARFVRAAF | YNN   | TH    | YPTQ            | SGENAN     | VN     | R      | L        | E        | K        | T       | L     | S   | T       | A     | A     | V  | E        | G     | T | A | I | S | A | N | E | F | E | K | T | L | F | : 275 |       |       |
| B_animalis_subsp.Lactis_KL612 | :   | TNQDSNSSQGLPGGYGSMARFVRAAF | YNN   | TH    | YPTQ            | SGENAN     | VN     | R      | L        | E        | K        | T       | L     | S   | T       | A     | A     | V  | E        | G     | T | A | I | S | A | N | E | F | E | K | T | L | F | : 275 |       |       |
| B_bifidum_ATTCC_11863         | :   | AWGACVSMHGIPGDVSSPSRFVRAAF | YTN   | TH    | YP              | QQN        | NEA    | N      | V        | S        | R        | L       | E     | F   | H       | T     | L     | V  | S        | V     | Q | M | V | D | G | M | S | K | M | G | N | G | Q | F     | ERTLF | : 276 |

|                               |   |                             |      |       |       |         |         |      |       |       |       |   |   |   |       |       |       |       |       |       |       |       |       |   |       |       |       |       |       |       |
|-------------------------------|---|-----------------------------|------|-------|-------|---------|---------|------|-------|-------|-------|---|---|---|-------|-------|-------|-------|-------|-------|-------|-------|-------|---|-------|-------|-------|-------|-------|-------|
|                               | * | 300                         | *    | 320   | *     | 340     |         |      |       |       |       |   |   |   |       |       |       |       |       |       |       |       |       |   |       |       |       |       |       |       |
| 5Y7P_L_salivarius             | : | SNCYDLNKTLYYTTYENRQIVAVTLNK | -DKD | GNRLV | TY    | PFERKQI | INKLNL  | LER  | HHHHH | : 333 |       |   |   |   |       |       |       |       |       |       |       |       |       |   |       |       |       |       |       |       |
| 2BJF_C_Perfringens            | : | TSCMCLEKGIYYNTYENNQINAIDM   | NKEN | LDGNE | LKTY  | KYNK    | TL      | SIN  | HVN   | ~~~~~ | : 329 |   |   |   |       |       |       |       |       |       |       |       |       |   |       |       |       |       |       |       |
| 4WL3_E_Feacalis               | : | SSCCNLEKGIYYRTYDNSQITAVDM   | NKEN | LEKDS | LIVY  | PM      | V       | ET   | QQ    | I     | N     | Y | A | N | L     | E     | H     | H     | H     | H     | ~     | : 331 |       |   |       |       |       |       |       |       |
| 2HEZ_B_Longum                 | : | TSGYSSKTNYYMNTYDDPAIRSYAM   | ADY  | D     | M     | D       | S       | S    | E     | L     | S     | V | A | R | ~~~~~ | : 316 |       |       |       |       |       |       |       |   |       |       |       |       |       |       |
| BSHA_L_acidophilus_NCFM       | : | TDCMNLDKGILYFTTYDNNRINAV    | DM   | H     | K     | A       | D       | L    | S     | E     | D     | L | I | C | Y     | D     | L     | F     | K     | Q     | D     | I     | E     | Y | M     | N     | ~~~~~ | : 325 |       |       |
| BSHB_L_acidophilus_NCFM       | : | SDGTNLDKGIYYTTYSNKQINVVDM   | NK   | E     | D     | L       | S       | N    | L     | I     | T     | Y | D | M | L     | D     | K     | T     | K     | F     | N     | H     | Q     | N | ~~~~~ | : 325 |       |       |       |       |
| L_fermentum_NCDO394           | : | RAATVAEDRTYEFQSYHQAVTSVKL   | T    | D     | D     | L       | L       | K    | R     | A     | T     | P | L | V | F     | D     | T     | A     | D     | V     | W     | A     | P     | V | K     | L     | N     | ~~~~~ | : 325 |       |
| BSHα_L_johnsonii100_100       | : | SDGTNLETGTFYYTYENNQINAIE    | L    | N     | K     | E       | N       | L    | N     | G     | D     | E | L | D | Y     | K     | L     | I     | E     | K     | Q     | T     | I     | N | Y     | Q     | N     | ~~~~~ | : 326 |       |
| BSHA_L_johnsoni_PF01          | : | SDGTNLETGTFYYTYENNQINAIE    | L    | N     | K     | E       | N       | L    | N     | G     | D     | E | L | D | Y     | K     | L     | I     | E     | K     | Q     | T     | I     | N | Y     | Q     | N     | ~~~~~ | : 326 |       |
| BSHB_L_johnsoni_PF01          | : | TACYSSGSKTYICNFEDDFELKTY    | K    | L     | D     | D       | H       | T    | M     | N     | S     | T | S | L | V     | T     | Y     | ~~~~~ | : 316 |       |       |       |       |   |       |       |       |       |       |       |
| BSHC_L_johnsoni_PF01          | : | SDCMNLDKGILYFTTYDNNQINAV    | D    | M     | N     | E       | N       | L    | D     | T     | S     | D | L | I | T     | Y     | E     | L     | F     | K     | D     | Q     | A     | I | K     | F     | E     | N     | ~~~~~ | : 325 |
| L_plantarum_80                | : | SSCCMDKGVYYRTYDNSQINSVNL    | N    | H     | E     | H       | L       | D    | T     | T     | E     | L | I | S | Y     | P     | L     | R     | S     | E     | A     | Q     | Y     | Y | A     | V     | N     | ~~~~~ | : 324 |       |
| L_plantaru_WCFs1              | : | SSCCMDKGVYYRTYDNSQINSVNL    | N    | H     | E     | H       | L       | D    | T     | T     | E     | L | I | S | Y     | P     | L     | R     | S     | E     | A     | Q     | Y     | Y | A     | V     | N     | ~~~~~ | : 324 |       |
| L_plantarum_80                | : | SNCYDLNKTLYYTTYENRQIVSVTL   | NK   | -DKN  | GNL   | V       | V       | Y    | P     | F     | E     | R | K | Q | I     | I     | N     | K     | L     | N     | ~~~~~ | : 324 |       |   |       |       |       |       |       |       |
| L_plantarum_80                | : | SDGVNLTGTFYYTYENNQINAVK     | M    | H     | A     | E       | D       | M    | E     | G     | Q     | L | H | R | F     | P     | I     | A     | S     | H     | Q     | S     | I     | N | M     | Q     | N     | ~~~~~ | : 325 |       |
| L_salivarius_JCM1046          | : | SNCYDLNKTLYYTTYENRQIVAVTL   | N    | E     | -DKN  | GNL     | I       | A    | Y     | P     | F     | E | R | K | Q     | V     | I     | N     | K     | L     | N     | ~~~~~ | : 324 |   |       |       |       |       |       |       |
| L_salivarius_UCC118           | : | SNCYDLNKTLYYTTYENRQIVAVTL   | NK   | -DKD  | GNRLV | TY      | PFERKQI | INKL | N     | ~~~~~ | : 316 |   |   |   |       |       |       |       |       |       |       |       |       |   |       |       |       |       |       |       |
| L_salivarius_B-30514          | : | SSCCMDKGVYYRTYDNSQINSVNL    | N    | H     | E     | H       | L       | D    | T     | T     | E     | L | I | S | Y     | P     | L     | R     | S     | E     | A     | Q     | Y     | Y | A     | V     | N     | ~~~~~ | : 324 |       |
| BSHβ_L_johnsonii100_100       | : | TACYSSGSKTYICNFEDDFELKTY    | K    | L     | D     | D       | H       | T    | M     | N     | S     | T | S | L | V     | T     | Y     | ~~~~~ | : 316 |       |       |       |       |   |       |       |       |       |       |       |
| B_animalis_subsp.lactis_Bi30  | : | SDCYSTATQTVLKKYDDMAVHSY     | AV   | K     | D     | F       | D       | A    | S     | S     | N     | L | Q | S | K     | ~~~~~ | : 314 |       |       |       |       |       |       |   |       |       |       |       |       |       |
| B_animalis_subsp.Lactis_KL612 | : | SDCYSTATQTVLKKYDDMAVHSY     | AV   | K     | D     | F       | D       | A    | S     | S     | N     | L | Q | S | K     | ~~~~~ | : 314 |       |       |       |       |       |       |   |       |       |       |       |       |       |
| B_bifidum_ATTCC_11863         | : | TSGYSGKTNYYMNTYEDPAIRSF     | A    | M     | S     | D       | F       | D    | M     | D     | S     | S | E | L | I     | T     | A     | D     | ~~~~~ | : 316 |       |       |       |   |       |       |       |       |       |       |

**Figure S3.** Proposed hydrolysis mechanism of GCA in BSH. (a) The neutral form of the N-terminal Cys2; (b) the zwitterionic state of the N-terminal Cys2; in this state the nucleophilic thiolate anion attacks the carbonyl carbon of the amide bond of GCA; (c) the proposed transition state associated with the nucleophilic attack by the thiolate anion and the proton abstraction by the lone pair of the nitrogen of the amide bond; (d) the acylated enzyme substrate complex and the free glycine amino acid; (e) proton abstraction from the water molecule by the N-terminal primary amine; (f) nucleophilic attack of the hydroxyl group to the carbonyl carbon of the acylated enzyme substrate complex, (g) the proposed transition state associated with the nucleophilic attack by the hydroxyl anion and proton abstraction by the sulphur atom of Cys2, (i) the neutral form of the N-terminal Cys2 and cholic acid. The lone pair of the electrons are represented by the double dots; breaking and forming bonds are in dashed lines. The protein residues, the glycine fragment of GCA and the water molecule are shown in black, pink and blue, respectively.

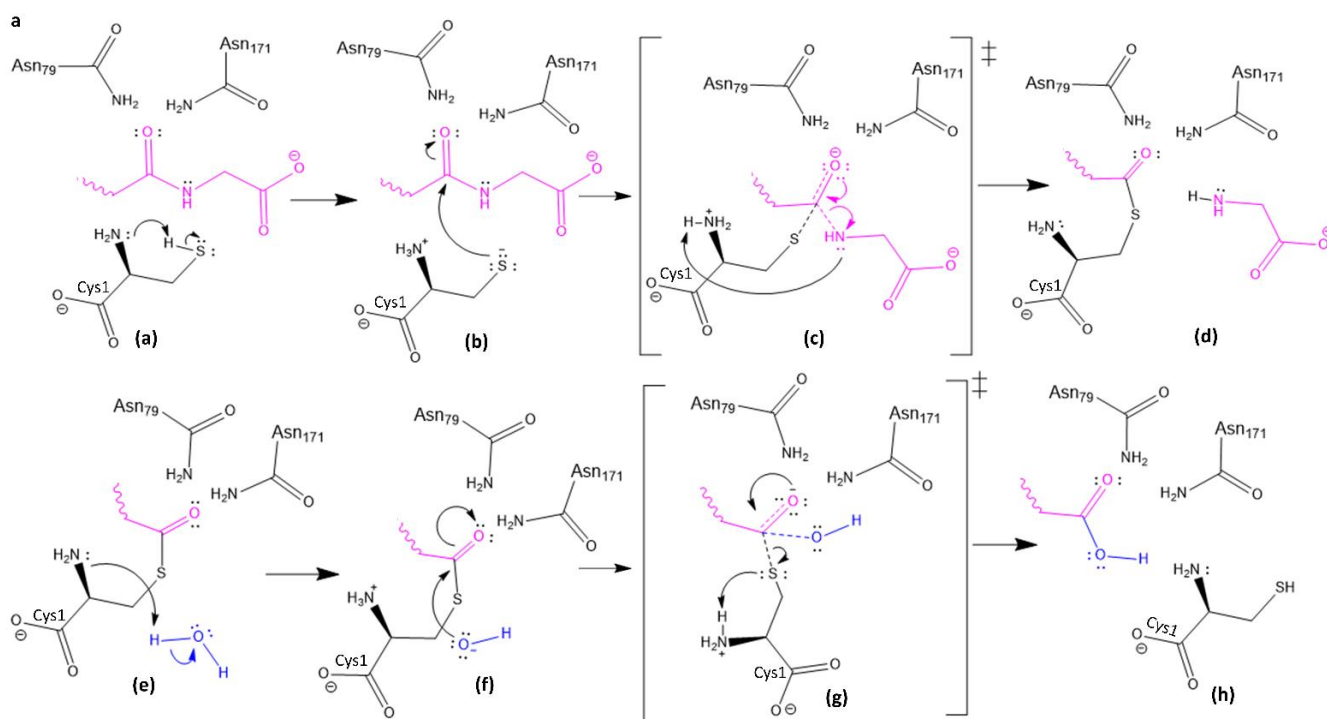

**Figure S4.** The active site of the *ls*BSH in complex with GCA. The snapshot of the most populated cluster obtained from the 50ns MD simulation. The GCA molecule is colored yellow and the active site residues are shown in grey stick representation. The loop region consisting of residues 164-171 are shown in red ribbon representation.

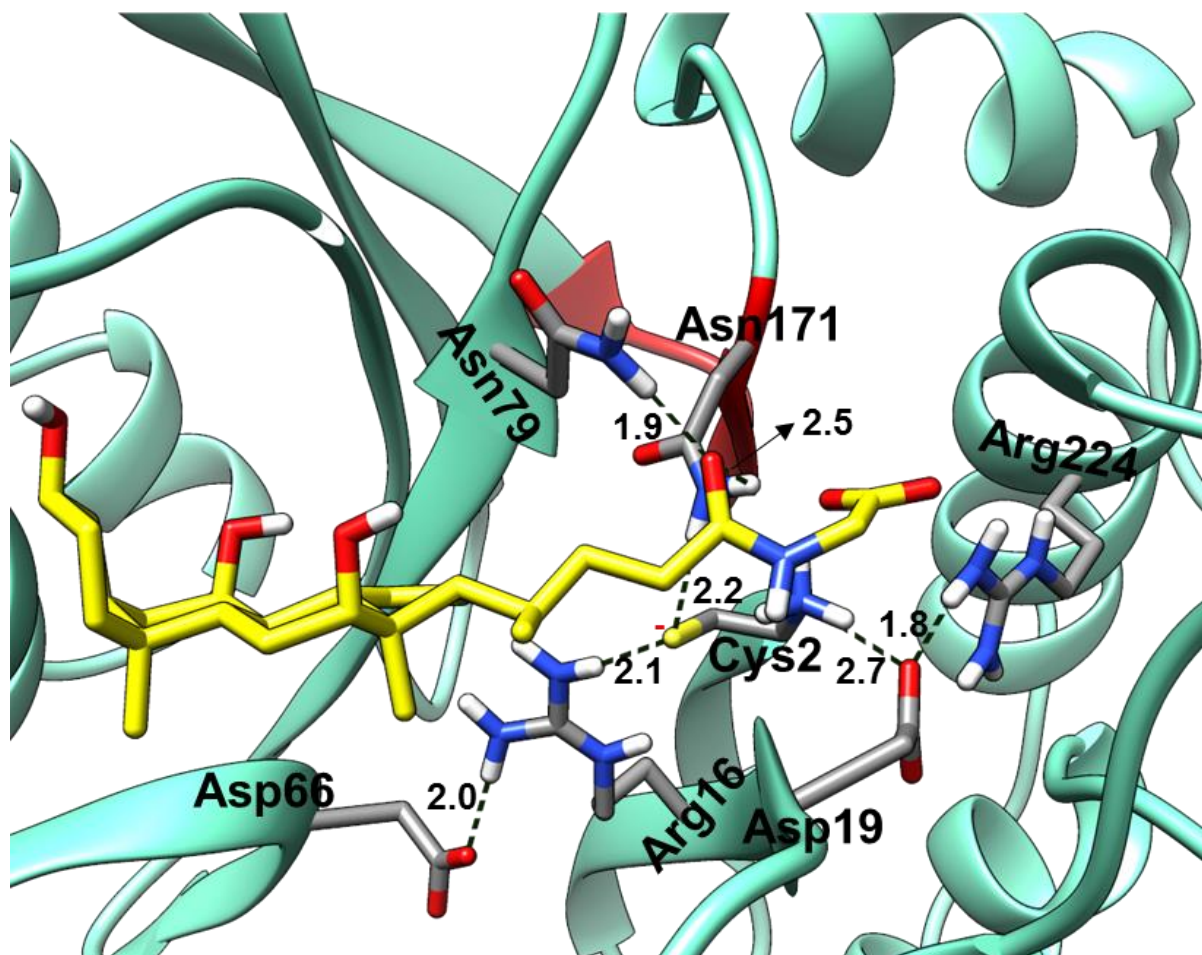

**Figure S5.** The surface representation of *ls*BSH bound to GCA obtained from the MD simulations. The hydrogen bonds formed by water molecules with the substrate are shown in the black dashed lines. The substrate binding cavity of the *ls*BSH is highlighted with the orange colour. The substrate GCA is shown in yellow colour.

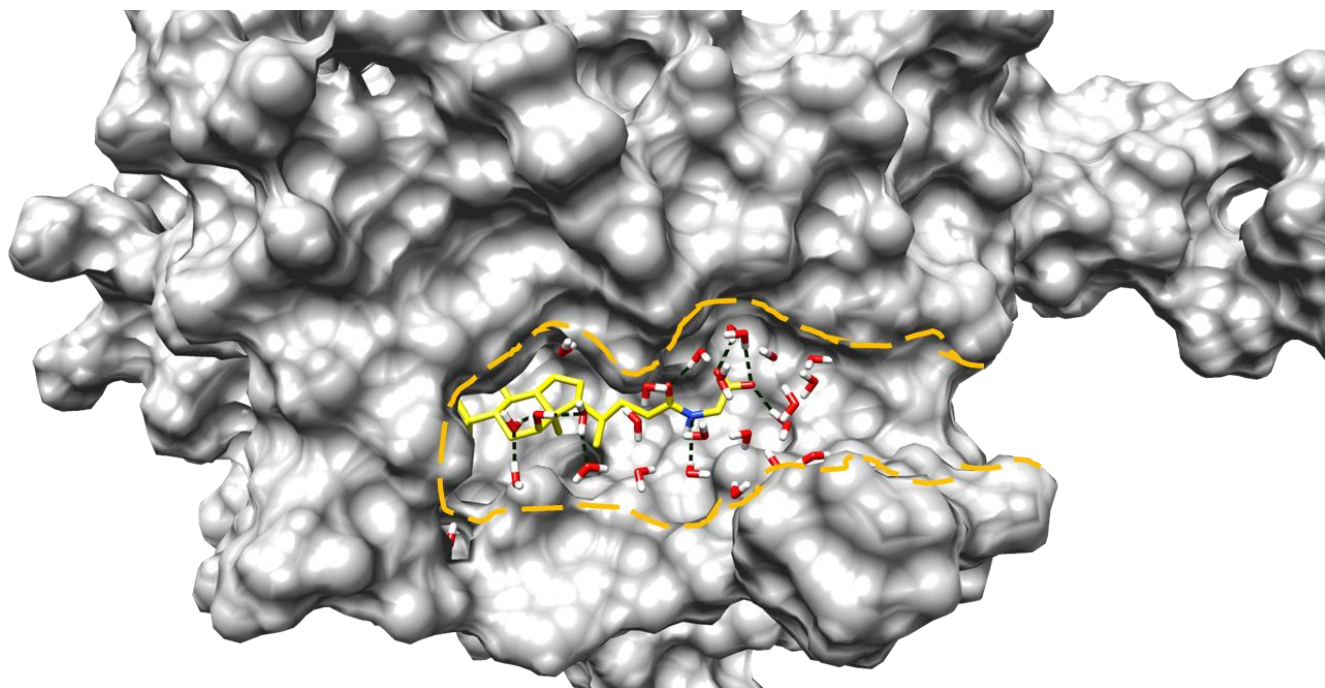



**Figure S6.** The substrate binding site of *ls*BSH in complex with GCA. The snapshot of the most populated cluster obtained from the 50ns MD simulation. GCA and the substrate stabilizing residues are shown in yellow and grey stick representation, respectively. The hydrophobic interactions mediated by the *ls*BSH residues with the substrate are shown in the orange dashed lines.

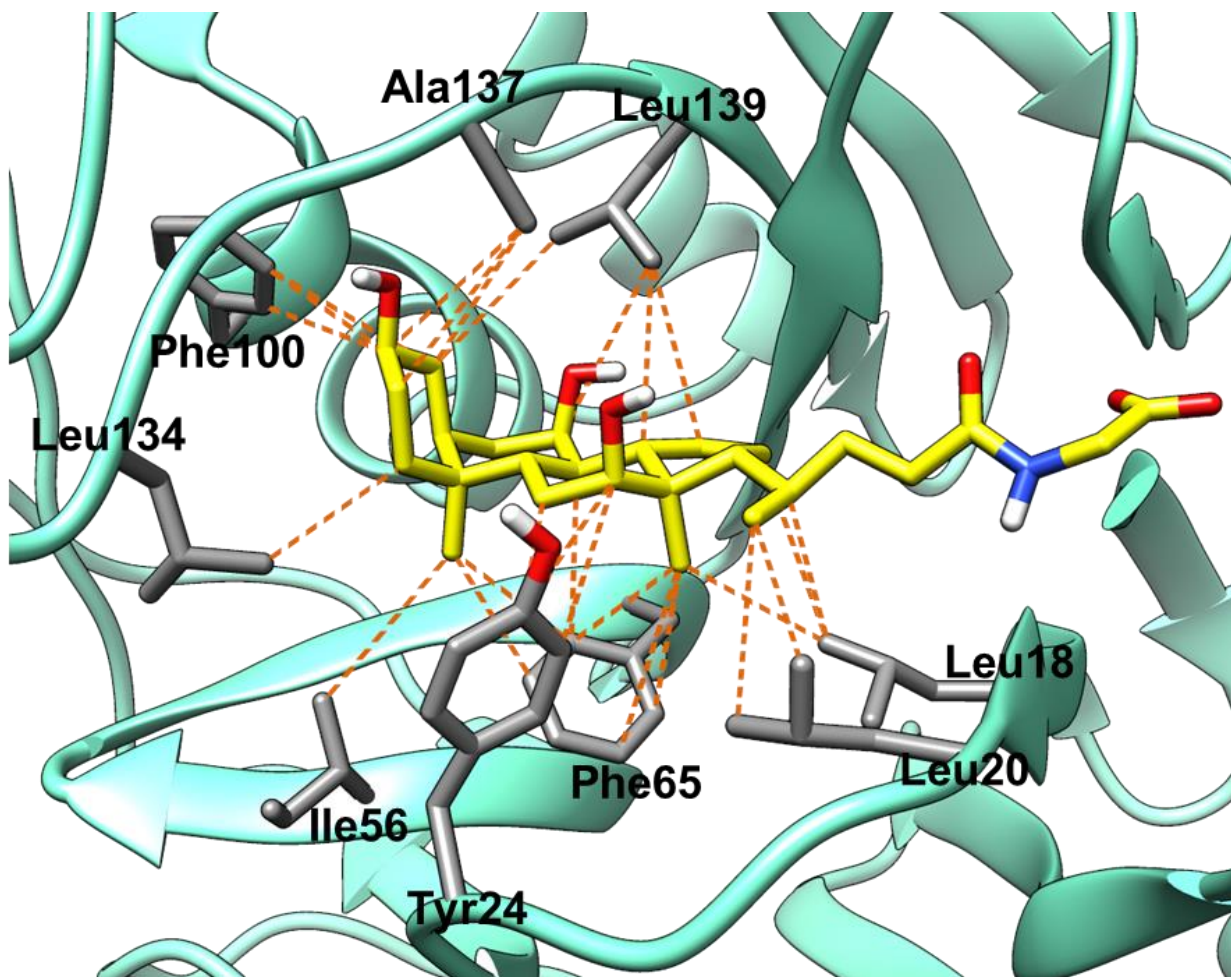

**Table S1.** Key bacterial plasmids and strains used in this study.

| Plasmids or strains     | Description                                                                                                                                                                                            | Source or Reference  |
|-------------------------|--------------------------------------------------------------------------------------------------------------------------------------------------------------------------------------------------------|----------------------|
| <b>Plasmids</b>         |                                                                                                                                                                                                        |                      |
| pBSH                    | pET21b containing <i>bsh</i> gene from <i>Lactobacillus salivarius</i> NRRL B-30514, Amp <sup>r</sup>                                                                                                  | <u>11</u>            |
| pBSH (C2S)              | pBSH derivative with C2S mutation                                                                                                                                                                      | This study           |
| pBSH (Y24F)             | pBSH derivative with Y24F mutation                                                                                                                                                                     | This study           |
| pBSH (F65A)             | pBSH derivative with F65A mutation                                                                                                                                                                     | This study           |
| pBSH (N171A)            | pBSH derivative with N171A mutation                                                                                                                                                                    | This study           |
| pBSH (164-171)          | pBSH derivative with the 164 -171 aa motif deleted                                                                                                                                                     | This study           |
| pBSH (Q257A)            | pBSH derivative with Q257A mutation                                                                                                                                                                    | This study           |
| pBSH (E270A)            | pBSH derivative with E270A mutation                                                                                                                                                                    | This study           |
| pBSH (Q257A E270A)      | pBSH derivative with double mutations (Q257A and E270A)                                                                                                                                                | This study           |
| <b>Strains</b>          |                                                                                                                                                                                                        |                      |
| <i>E.coli</i> BL21(DE3) | F <sup>-</sup> ompT gal dcm lon hsdSB(rB <sup>-</sup> mB <sup>-</sup> ) λ(DE3 [lacI lacUV5-T7 gene 1 ind1 sam7 nin5])                                                                                  | Novagen              |
| <i>E.coli</i> XL1-Blue  | EndA1 gyrA96(nal <sup>R</sup> ) thi-1 recA1 relA1 lac glnV44 F' <sup>+</sup> [::Tn10 proAB <sup>+</sup> lacI <sup>q</sup> Δ(lacZ)M15] hsdR17(r <sub>K</sub> <sup>-</sup> m <sub>K</sub> <sup>+</sup> ) | Agilent Technologies |
| JL885                   | <i>E.coli</i> BL21(DE3) containing the plasmid pBSH                                                                                                                                                    | <u>11</u>            |
| JL1189                  | <i>E.coli</i> BL21(DE3) containing pBSH (C2S)                                                                                                                                                          | This study           |
| JL1191                  | <i>E.coli</i> BL21(DE3) containing pBSH (Y24F)                                                                                                                                                         | This study           |
| JL1193                  | <i>E.coli</i> BL21(DE3) containing pBSH (F65A)                                                                                                                                                         | This study           |
| JL1196                  | <i>E.coli</i> BL21(DE3) containing pBSH (N171A)                                                                                                                                                        | This study           |
| JL1198                  | <i>E.coli</i> BL21(DE3) containing pBSH (164-171)                                                                                                                                                      | This study           |
| JL1201                  | <i>E.coli</i> BL21(DE3) containing pBSH (Q257A)                                                                                                                                                        | This study           |
| JL1203                  | <i>E.coli</i> BL21(DE3) containing pBSH (E270A)                                                                                                                                                        | This study           |
| JL1205                  | <i>E.coli</i> BL21(DE3) containing pBSH (Q257A E270A)                                                                                                                                                  | This study           |

**Figure S7.** SDS-PAGE analysis of the purified wild-type (WT) *Is*BSH and its derivative with specific amino acid substitution mutagenesis or deletion.

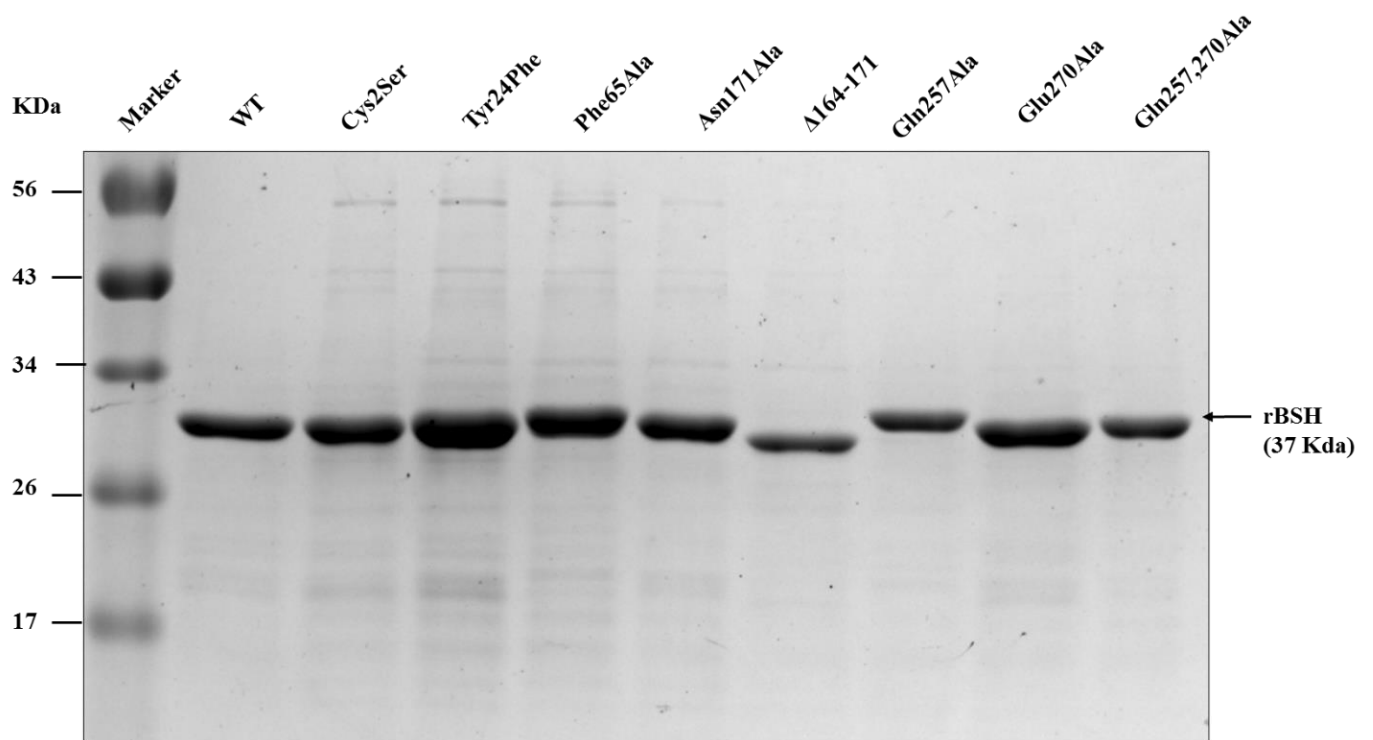

**Table S2.** The primers used for site-directed amino acid substitution mutagenesis in this study.

| <b>Primer Name</b> | <b>Sequence 5'- 3'<sup>a</sup></b>                               | <b>AA Mutation</b> |
|--------------------|------------------------------------------------------------------|--------------------|
| BSHMT1-F           | CCATTAAAGTAATTGCTGT <b>AG</b> ACATGGATCCCGACCCATTT               | Cys2Ser            |
| BSHMT1-R           | AAATGGGTCGGGATCCATG <b>TCT</b> TACAGCAATTACTTTAAATGG             |                    |
| BSHMT2-F           | GATTACCTCCTCACC <b>AA</b> ATGAAAAATCTAAATCTAAGTTTCTTCCAA         | Tyr24Phe           |
| BSHMT2-R           | TTGGAAGAACTTAGA <b>TTT</b> TAGATTTTTTCATTTGGTGAGGAGGTAATC        |                    |
| BSHMT3-F           | TCCATCCTCATTAATAGCATCT <b>TGC</b> ATACAATGGGTAATCGTTAGCGACAATTCC | Phe65Ala           |
| BSHMT3-R           | GGAATTGTCGCTAACGATTACCCATTGTAT <b>GC</b> AGATGCTATTAATGAGGATGGA  |                    |
| BSHMT4-F           | CAGATTGTACATCTGATAATTAATCTGGATT <b>TGC</b> AGTCAATATTCCAATTGG    | Asn171Ala          |
| BSHMT4-R           | CCAATTGGAATATTGACT <b>GCA</b> AATCCAGAATTTAATTATCAGATGTACAATCTG  |                    |
| BSHMT5-F           | GTACATCTGATAATTAATCTGGATTATCATAAATATGTACTCCAGATTTAGTTACTTC       | Δ 164-171          |
| BSHMT5-R           | GAAGTAACTAAATCTGGAGTACATATTTATGATAATCCAGAATTTAATTATCAGATGTAC     |                    |
| BSHMT6_Q257A-F     | CCATATACTAGGGACAGTAGA <b>AGCA</b> ATAAAGGGCGTTAATAAGACAG         | Gln257Ala          |
| BSHMT6_Q257A-R     | CTGTCTTATTAACGCCCTTTAT <b>TGCT</b> TCTACTGTCCCTAGTATATGG         |                    |
| BSHMT7_E270A-F     | GACAGAATCAGGAAAAGA <b>GC</b> ATACACTGTATATTCTGAATTGC             | Glu270Ala          |
| BSHMT7_E270A-R     | GCAATTCGAATATACAGTGTAT <b>TGCT</b> TCTTTCTGATTCTGTC              |                    |

<sup>a</sup> Bolded letters indicate the nucleotides designed for aa substitution mutagenesis

**Figure S8.** Comparison of the *ls*BSH binding site in the wild type (A) and Tyr24Phe mutation (B). The water-mediated hydrogen bond between Tyr24 and the hydroxyl group of GCA is shown in black dashed lines. The hydrophobic interactions between Phe24 and GCDCA are shown in the orange dashed lines.

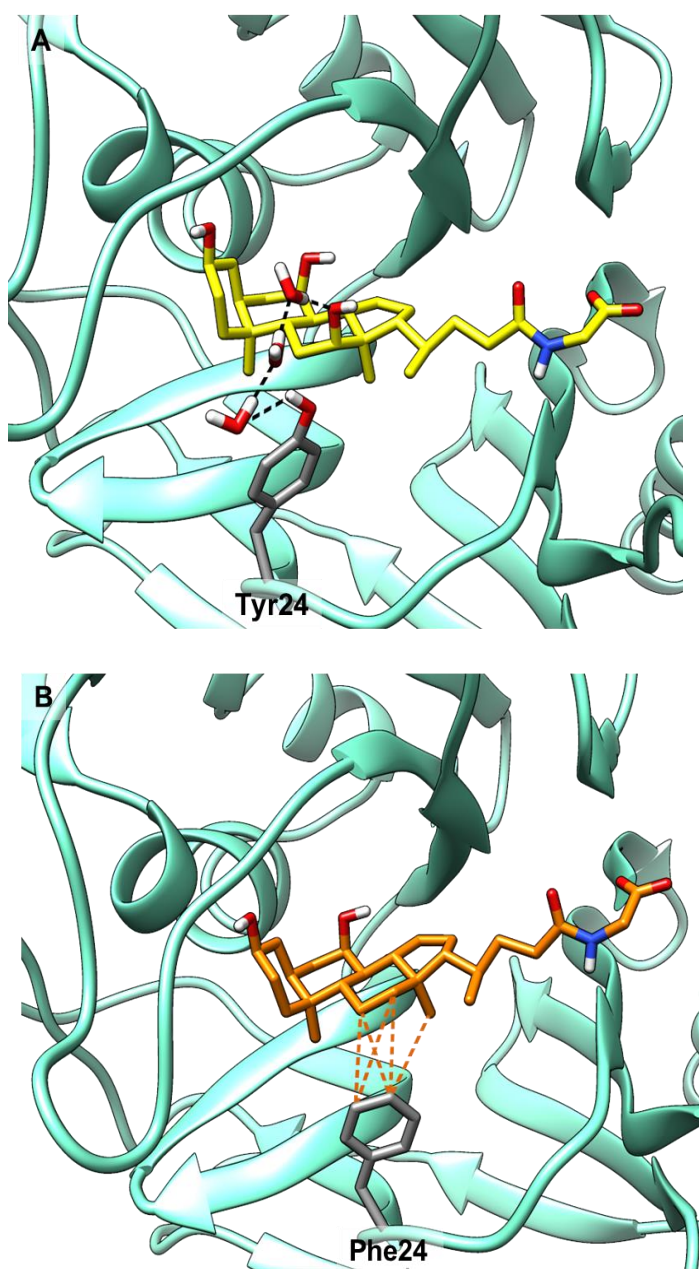

Supplement: 41598_2019_48850_MOESM1_ESM.pdf [file 41598_2019_48850_MOESM1_ESM.pdf]
